# Supplementary material for: Membrane Distillation of Meat Industry Effluent with Hydrophilic Polyurethane Coated Polytetrafluoroethylene Membranes
Source: MDPI journal article supplement (doi:10.3390/membranes7040055), 2017-09-29
Supplement: s1 [file s1]

# Supplementary Material: Membrane Distillation of Meat Industry Effluent with Hydrophilic Polyurethane Coated Olytetrafluoroethylene Membranes

M. G. Mostafa, Bo Zhu, Marlene Cran, Noel Dow, Nicholas Milne, Dilip Desai, Mikel Duke

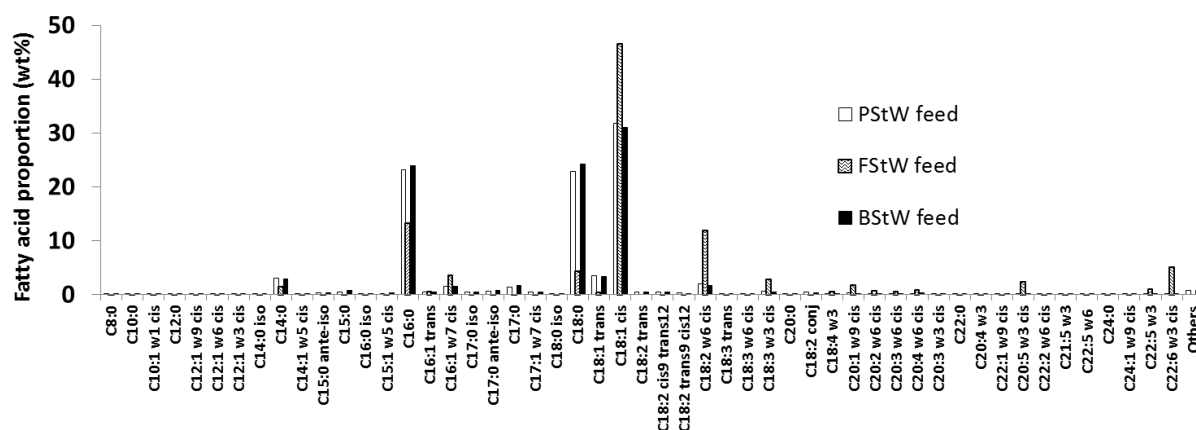

**Figure S1.** FAME analysis result showing the weight proportion of the fatty acid groups present in the fats from the stick water samples shown in Table 2 (PStW, FStW and BStW2) used as MD feeds.
